# Supplementary material for: Synthesis of Novel Trisubstituted Olefin-Type Probe Molecules Containing N-Heterocycles and Their Application in Detection of Malononitrile
Source: MDPI journal article supplement (doi:10.3390/org5020004), 2024-04-02
Supplement: s1 [file s1]

# Supplementary Materials

## Synthesis of Novel Trisubstituted Olefin-type Probe Molecules Containing *N*-Heterocycles and Their Application in Detection of Malononitrile

Zhao-Hua Chen<sup>1</sup>, Shi-Wei Yu<sup>1</sup>, Wen-jin Xu<sup>1</sup>, Miao-Xin Li<sup>1</sup>, Yong Zeng<sup>1</sup>, Si-Wei Deng<sup>1</sup>,  
Jian-Yun Lin<sup>1,2,\*</sup> and Zhao-Yang Wang<sup>1\*</sup>

<sup>1</sup> School of Chemistry, South China Normal University; GDMPA Key Laboratory for Process Control and Quality Evaluation of Chiral Pharmaceuticals; Guangzhou Key Laboratory of Analytical Chemistry for Biomedicine; Key Laboratory of Theoretical Chemistry of Environment, Ministry of Education, Guangzhou, Guangdong 510006, P. R. China; 2021022663@m.scnu.edu.cn (Z.-H.C.); 2021022671@m.scnu.edu.cn (S.-W.Y.); xwj31916850@163.com (W.-J.X.); limiaoxin1215@163.com (M.-X.L.); 2023022676@m.scnu.edu.cn (Y.Z.); dsw766817@163.com (S.-W.D.)

<sup>2</sup> School of Mechanical and Automotive Engineering, South China University of Technology, Guangzhou 510640, P. R. China

\* Correspondence: jianyunlin@outlook.com (J.-Y.L.); wangzy@scnu.edu.cn (Z.-Y.W.); Fax: (+86)-020-3931-0187; Tel: (+86)-020-3931-0258

## Table of Contents

|                                                                                                |        |
|------------------------------------------------------------------------------------------------|--------|
| <sup>1</sup> H NMR, <sup>13</sup> C NMR and HR-MS Spectra for All Compounds <b>3a-3f</b> ..... | [2-13] |
|------------------------------------------------------------------------------------------------|--------|

**$^1\text{H}$  NMR,  $^{13}\text{C}$  NMR and HR-MS Spectra for All Compounds 3a-3f**

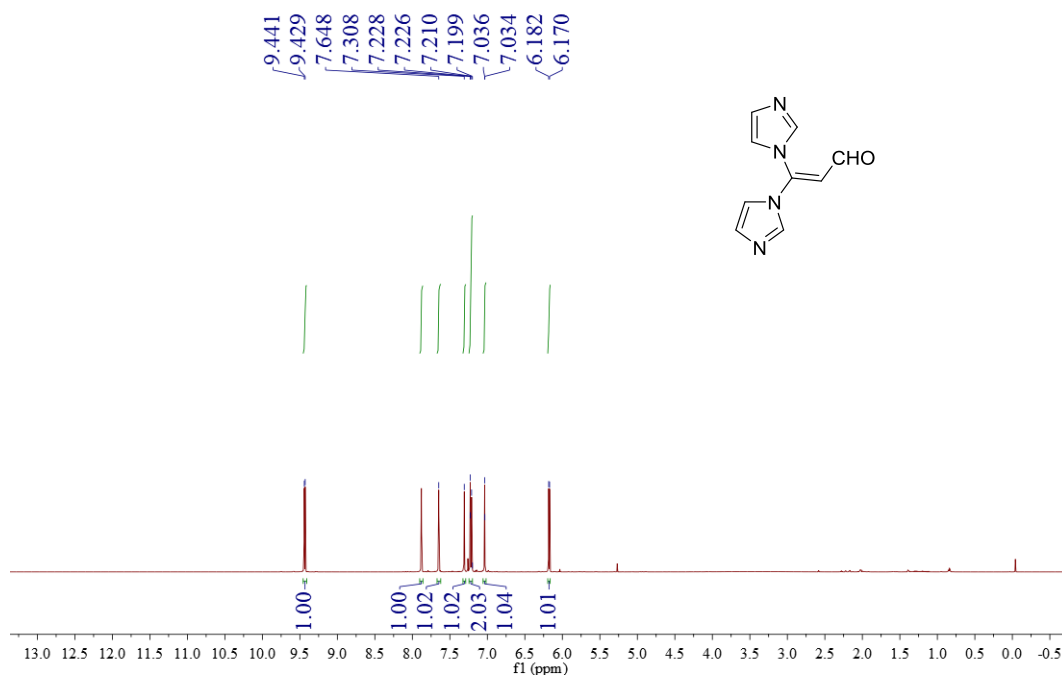

$^1\text{H}$  NMR spectrum of compound **3a**

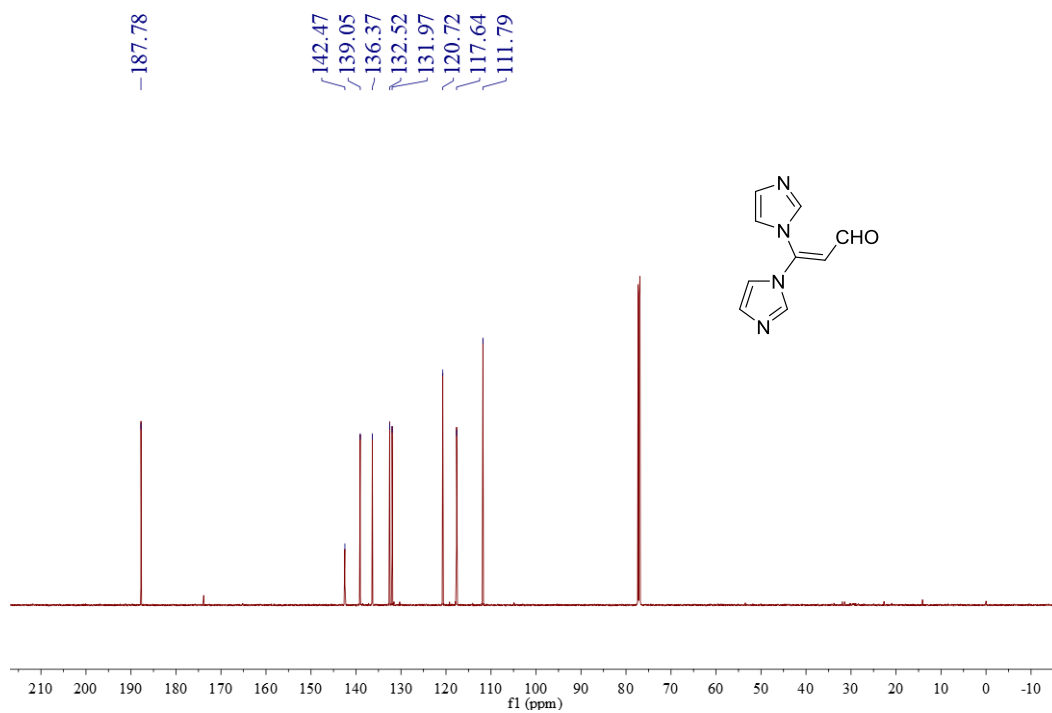

$^{13}\text{C}$  NMR spectrum of compound **3a**

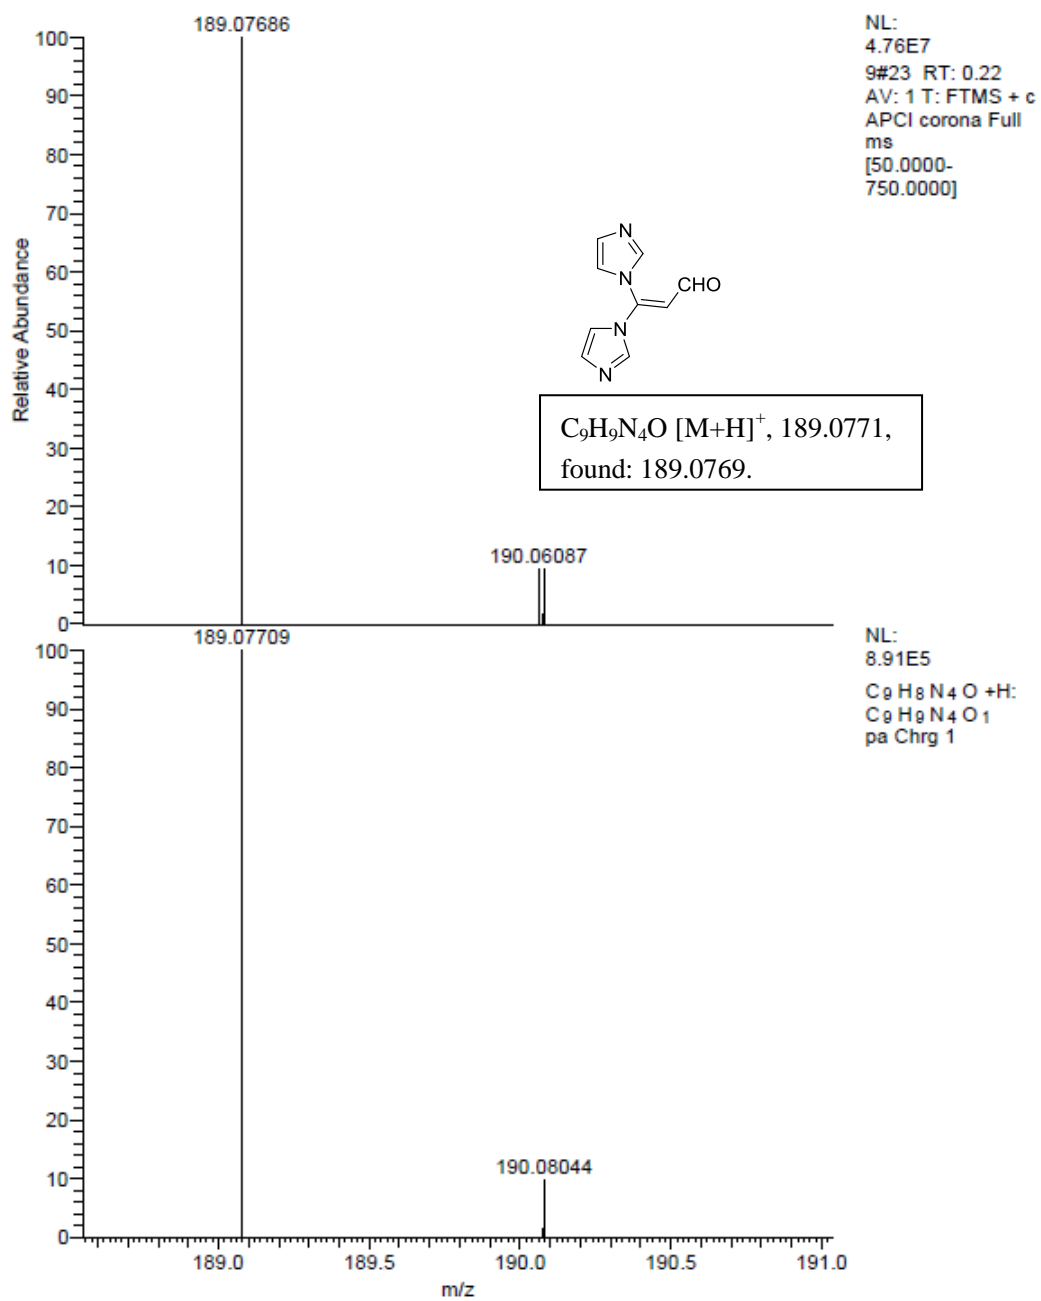

HR-MS of compound **3a**

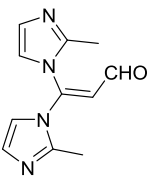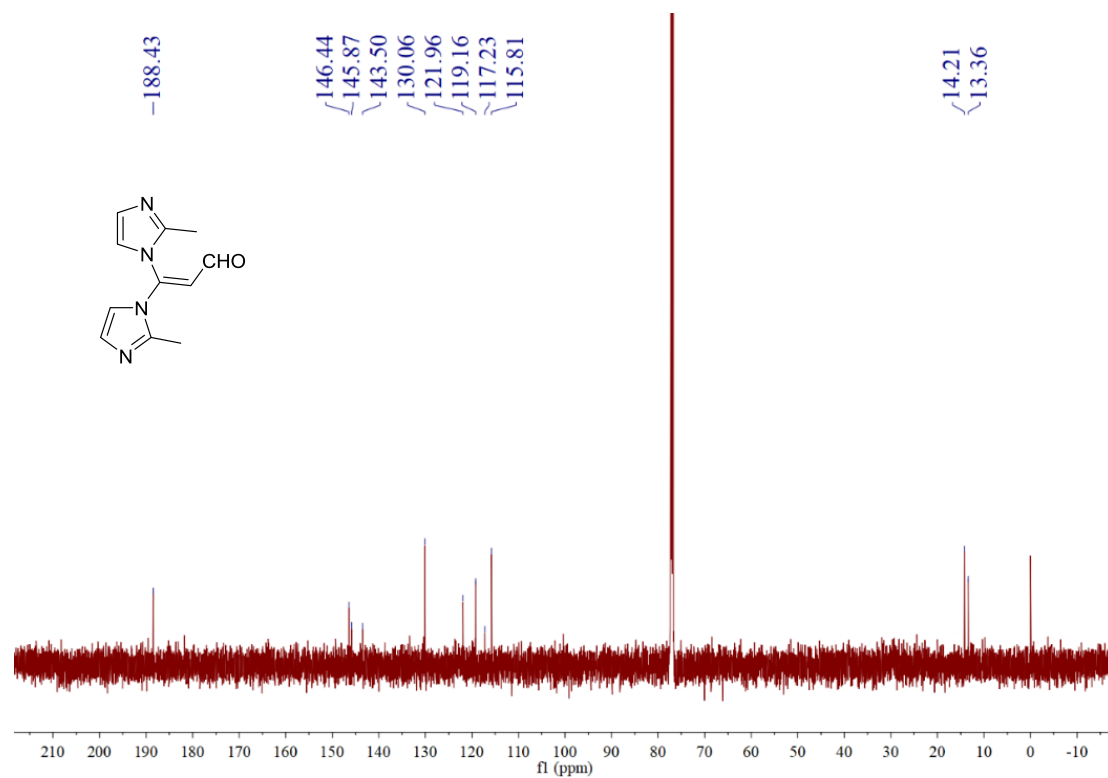

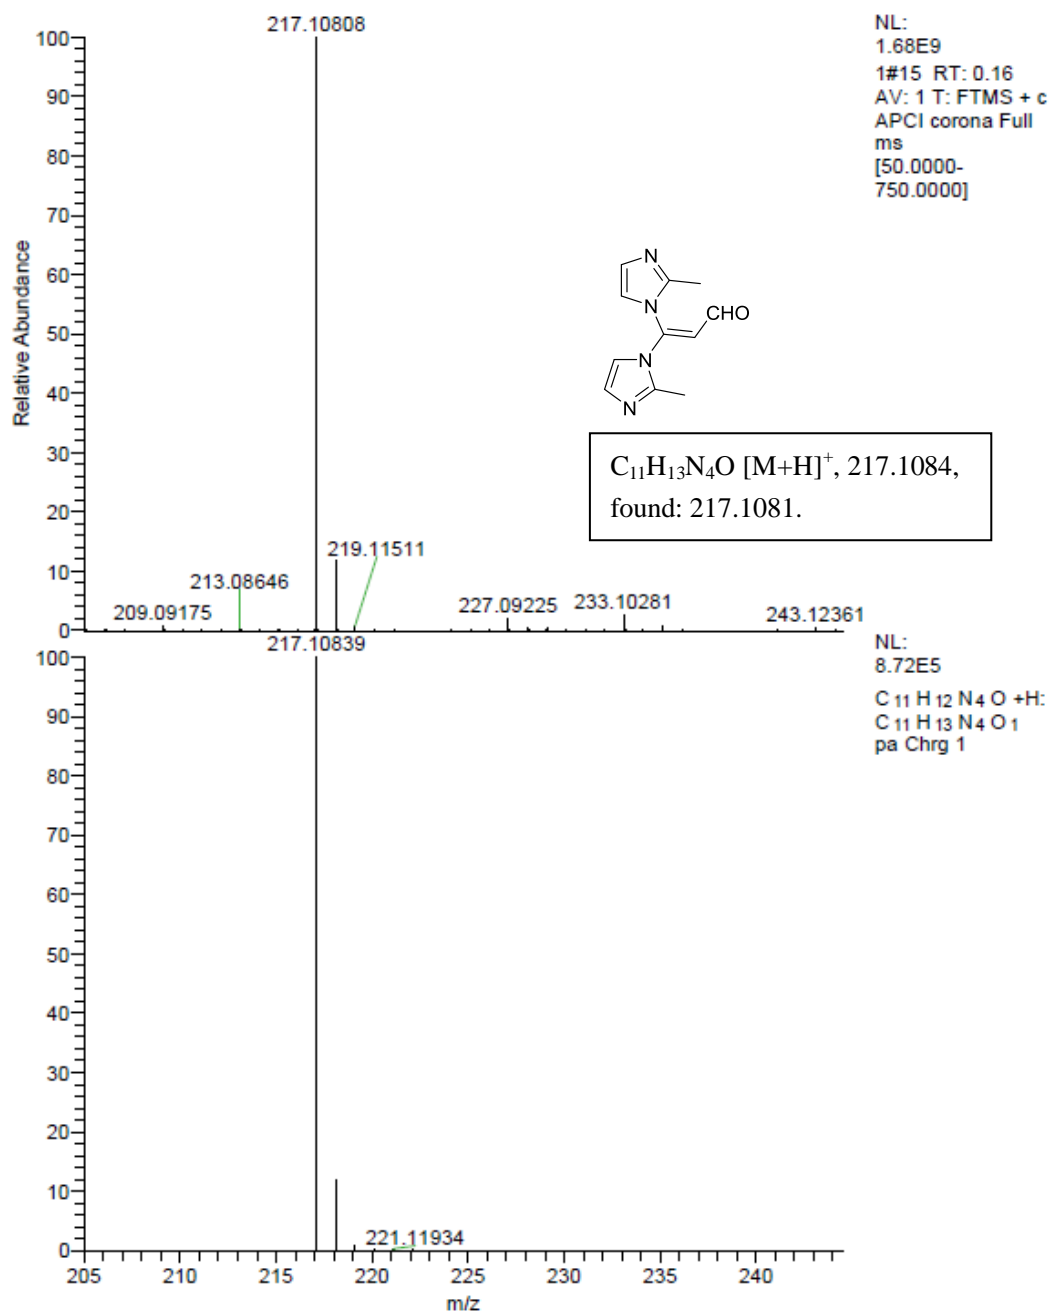

HR-MS of compound **3b**

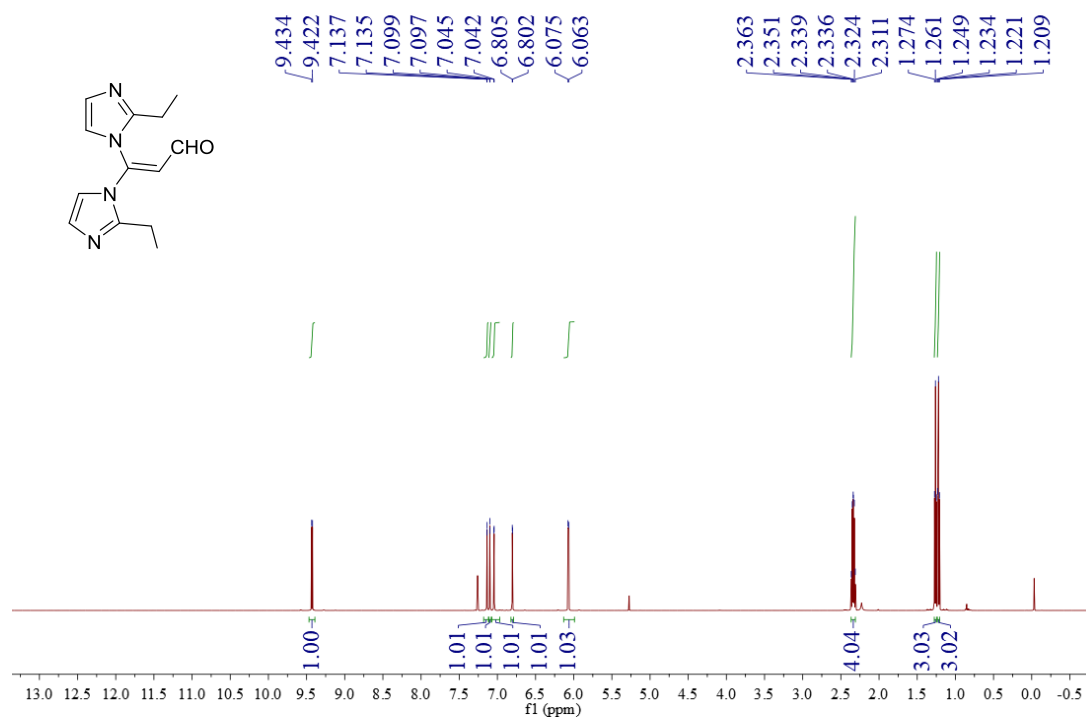

<sup>1</sup>H NMR spectrum of compound **3c**

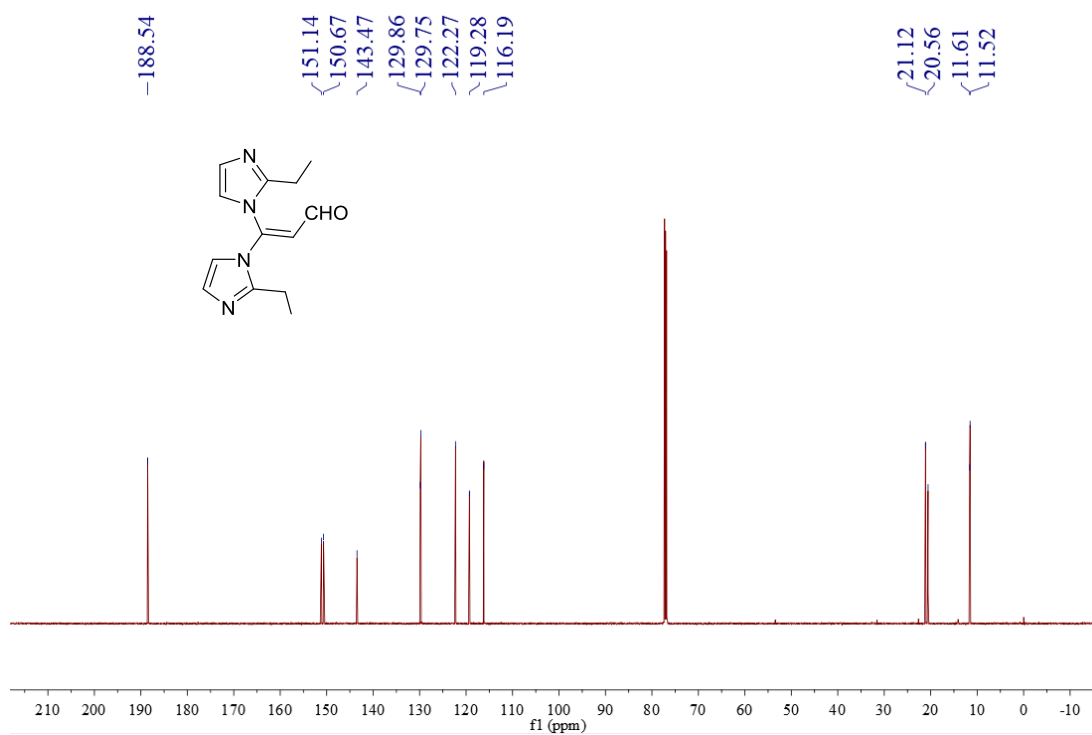

<sup>13</sup>C NMR spectrum of compound **3c**

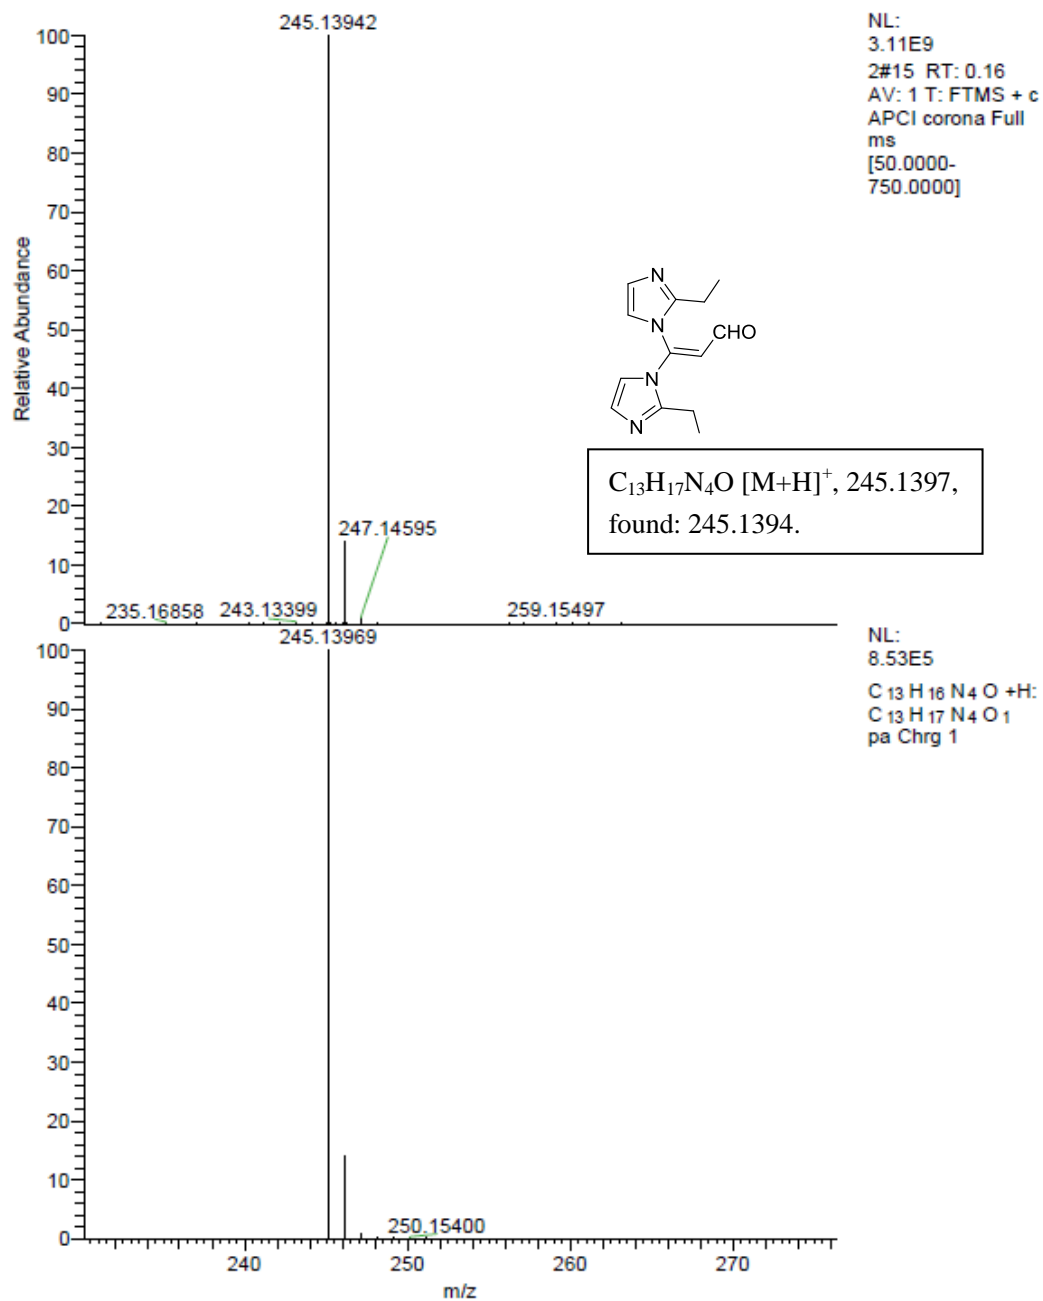

HR-MS of compound **3c**

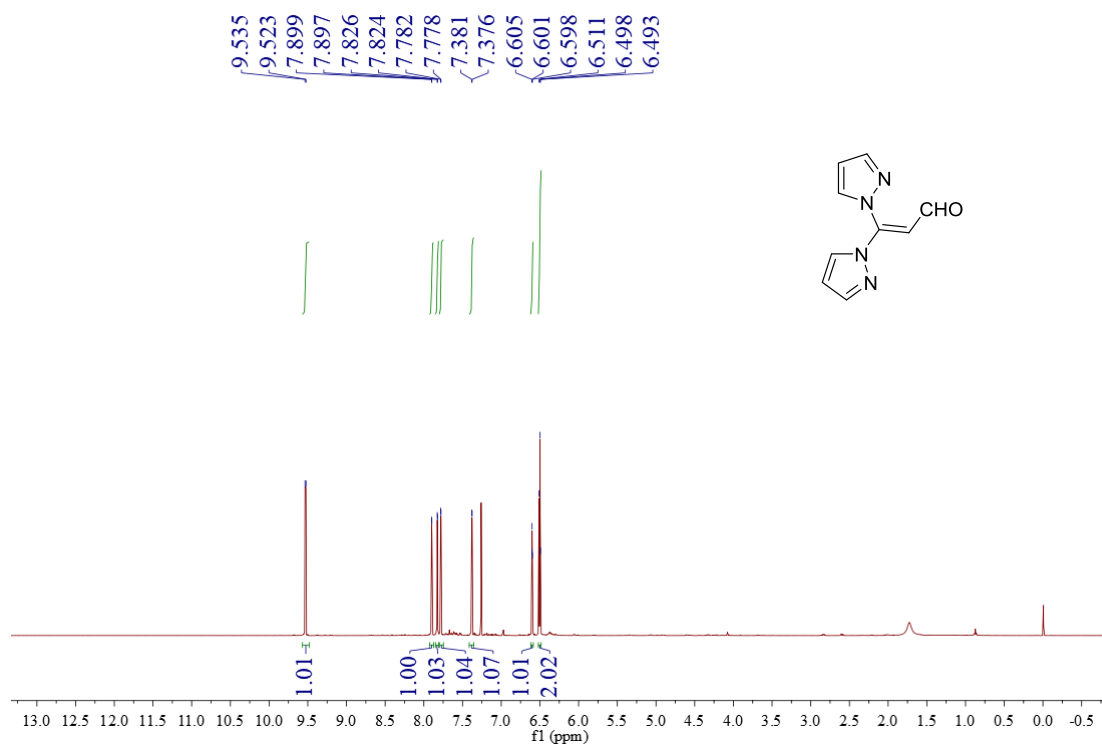

<sup>1</sup>H NMR spectrum of compound **3d**

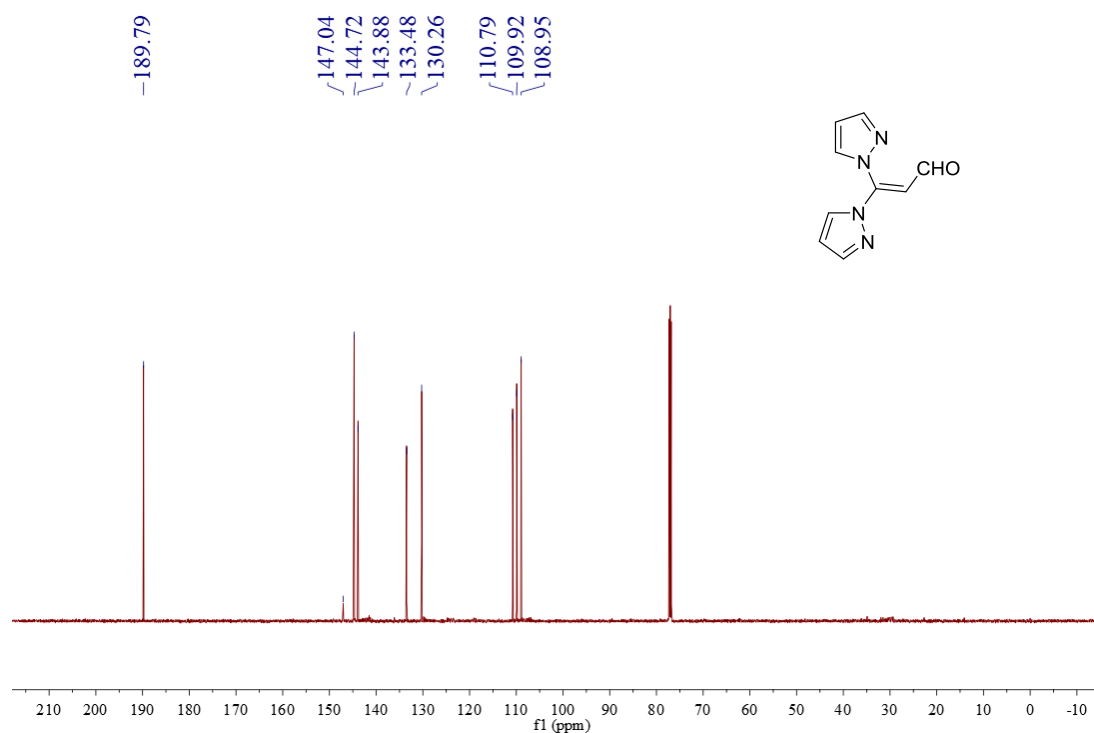

<sup>13</sup>C NMR spectrum of compound **3d**



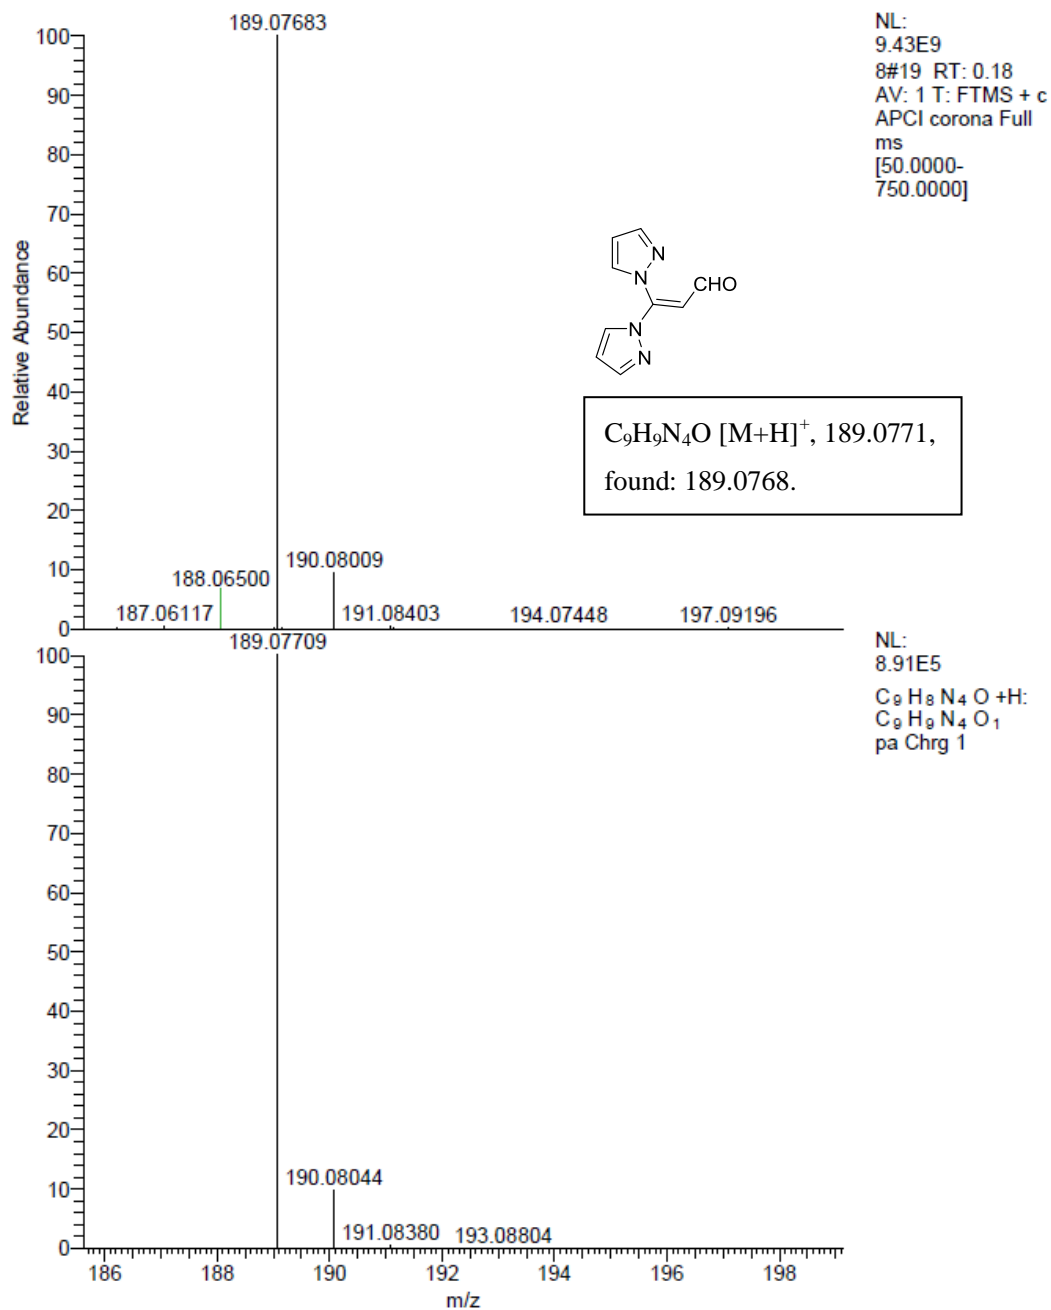

HR-MS of compound **3d**

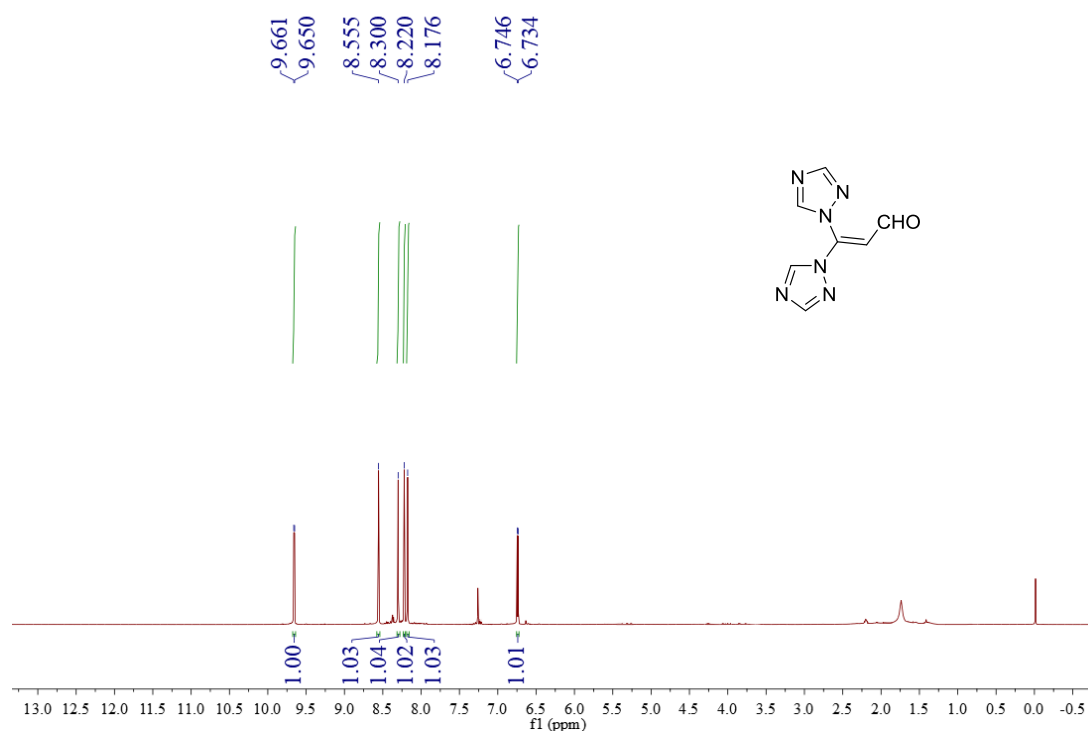

<sup>1</sup>H NMR spectrum of compound **3e**

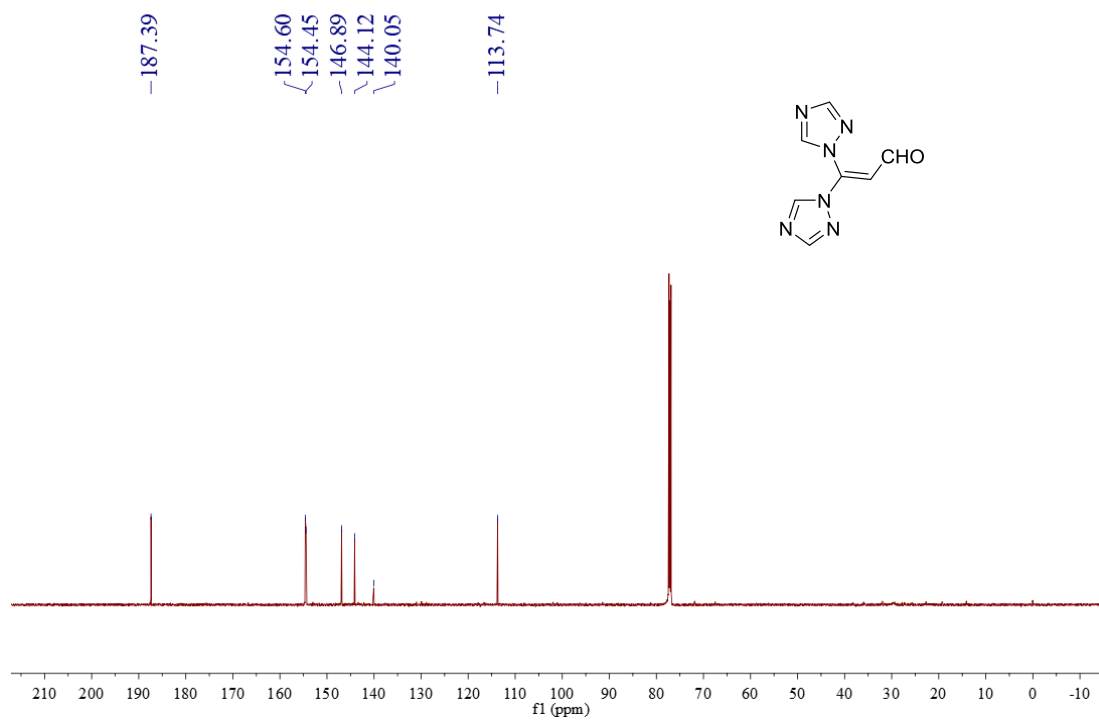

<sup>13</sup>C NMR spectrum of compound **3e**

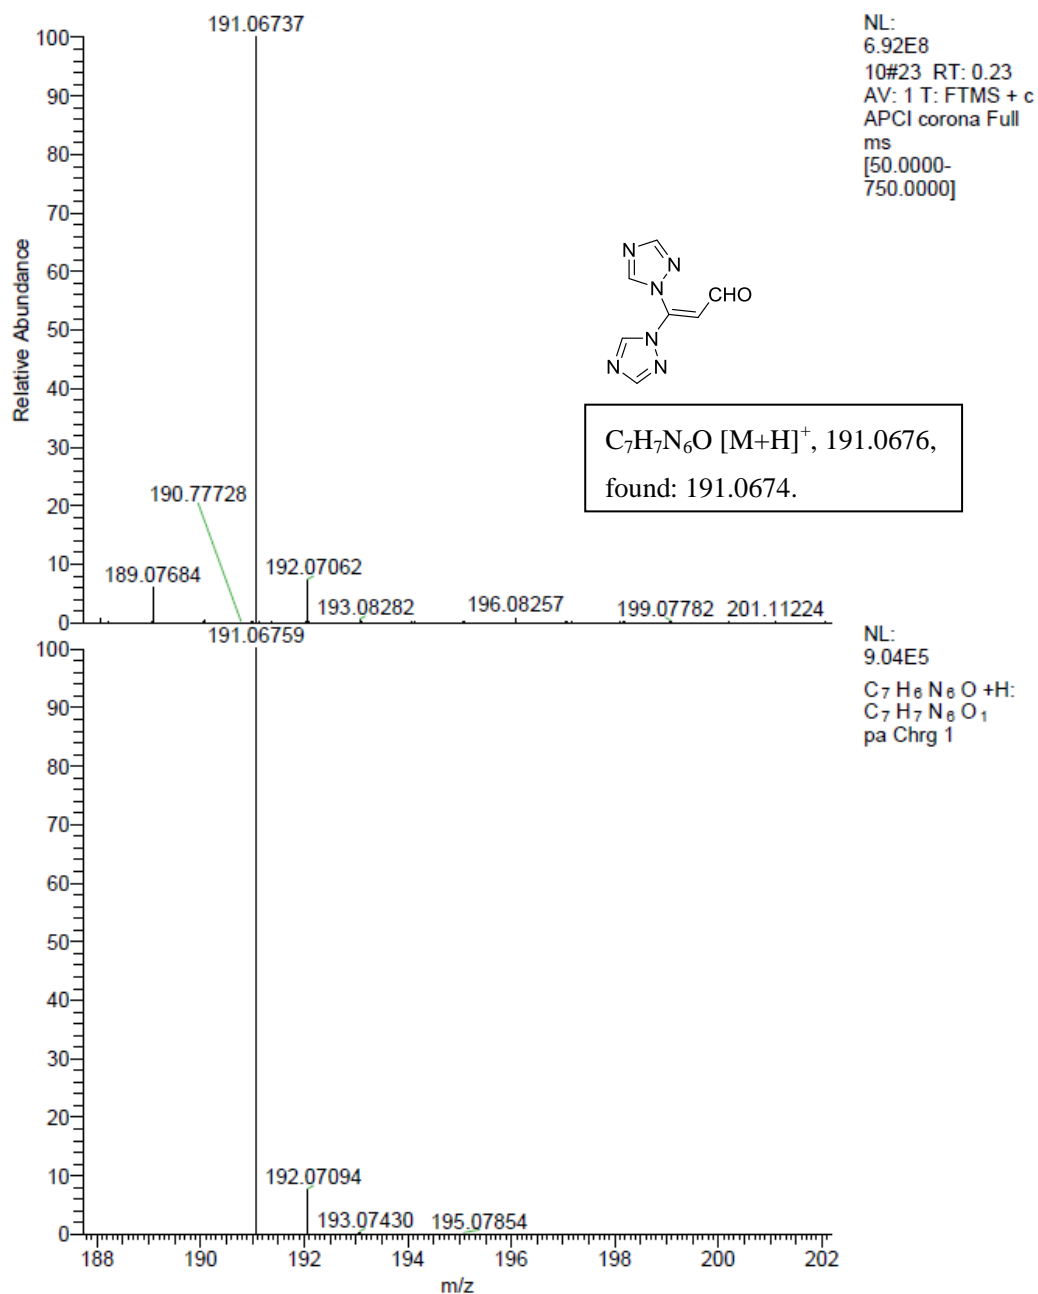

HR-MS of compound **3e**

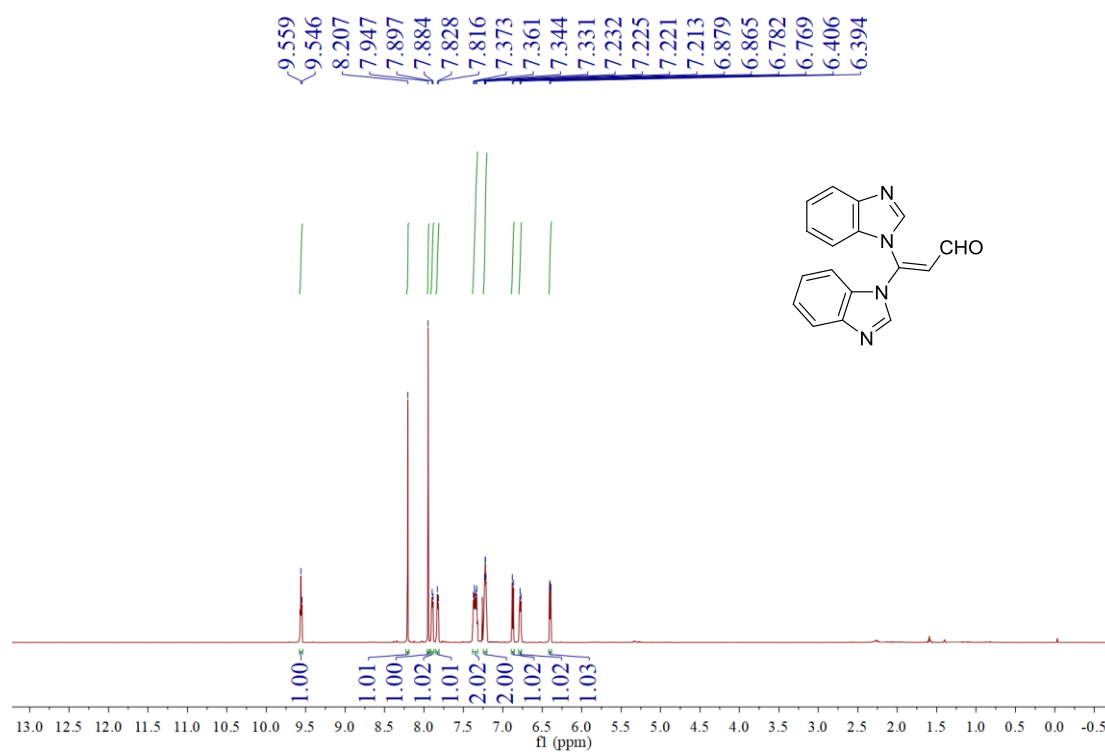

$^1\text{H}$  NMR spectrum of compound **3f**

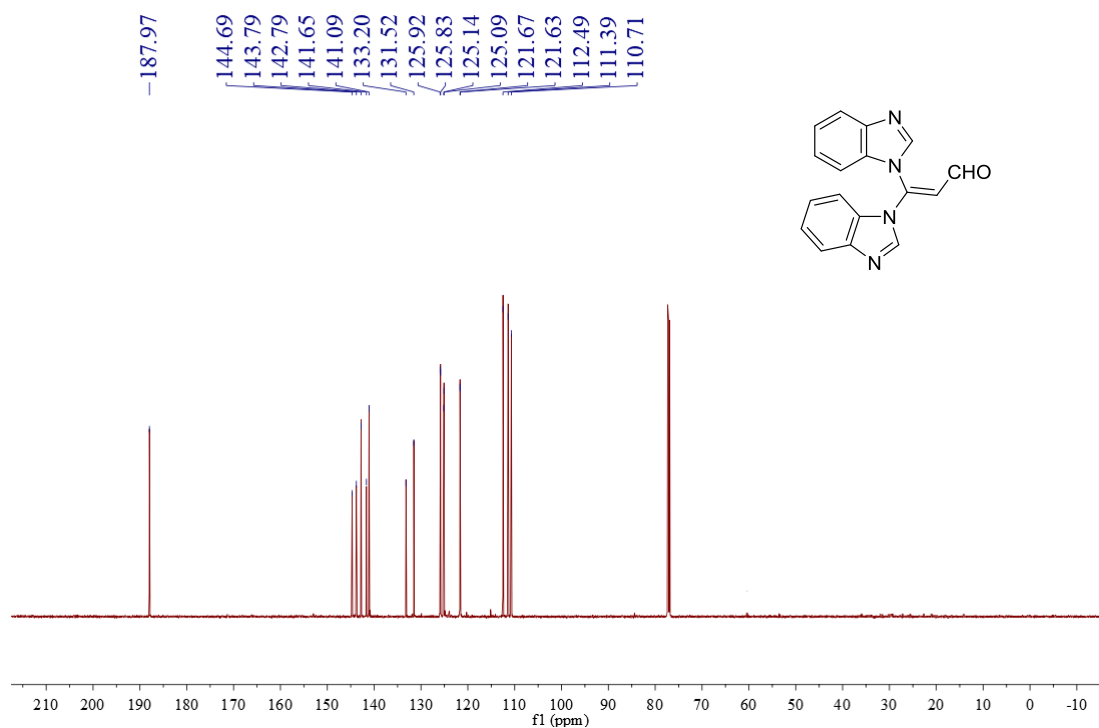

$^{13}\text{C}$  NMR spectrum of compound **3f**

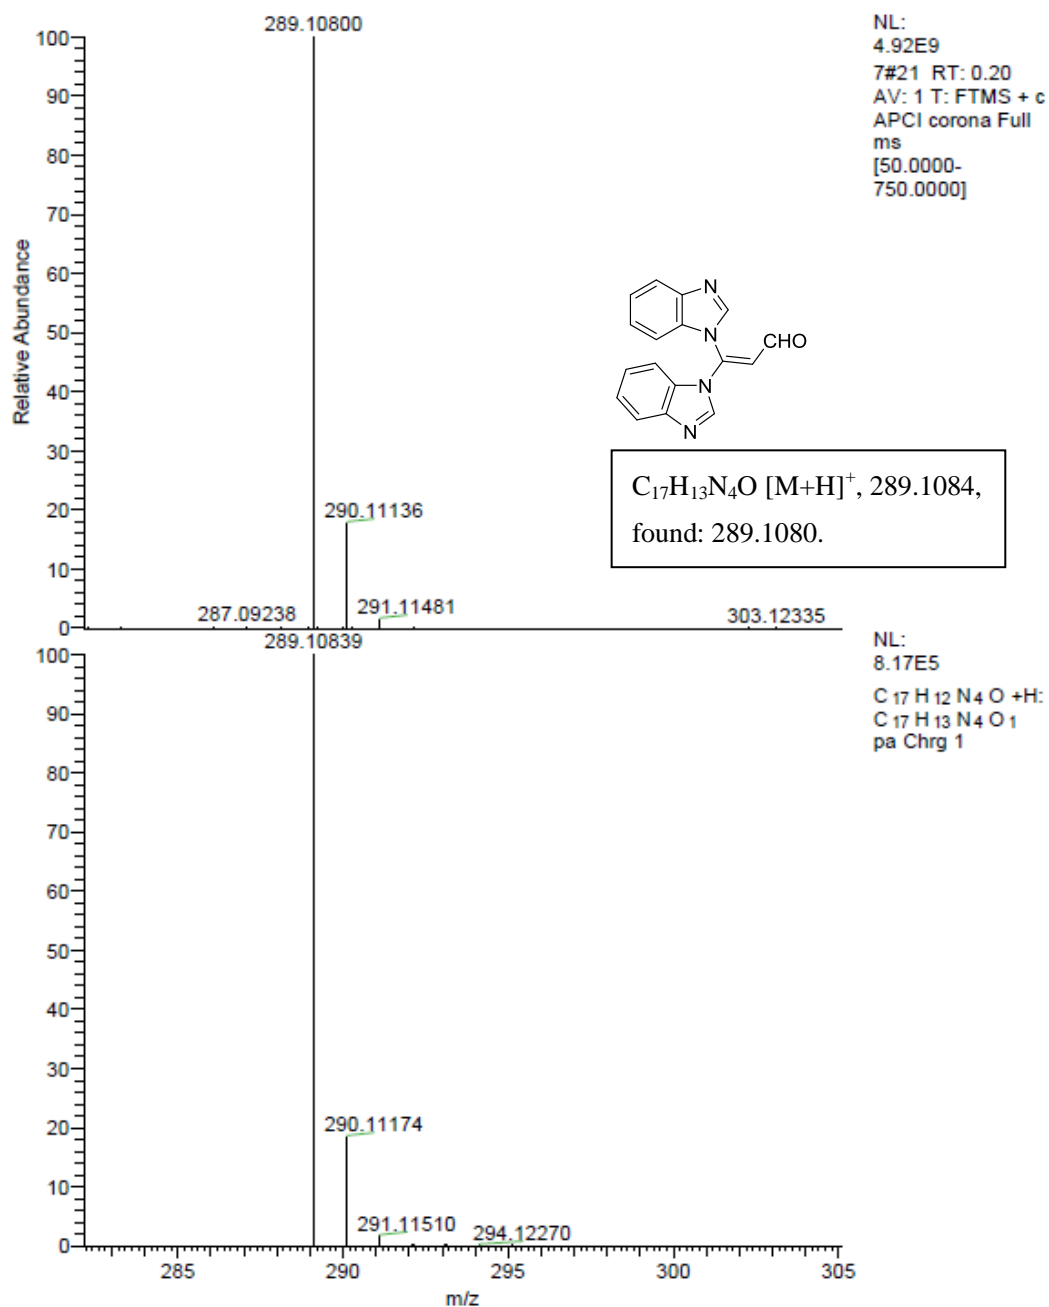

HR-MS of compound **3f**
